# Supplementary material
Source: Springer Nature journal article supplement (https://www.springermedizin.de/resource/supplementary/12889_2012_4689_MOESM4_ESM.pdf/9493212)

**A** - Forms of cause of death and sex, averaged from 1985 though 2009

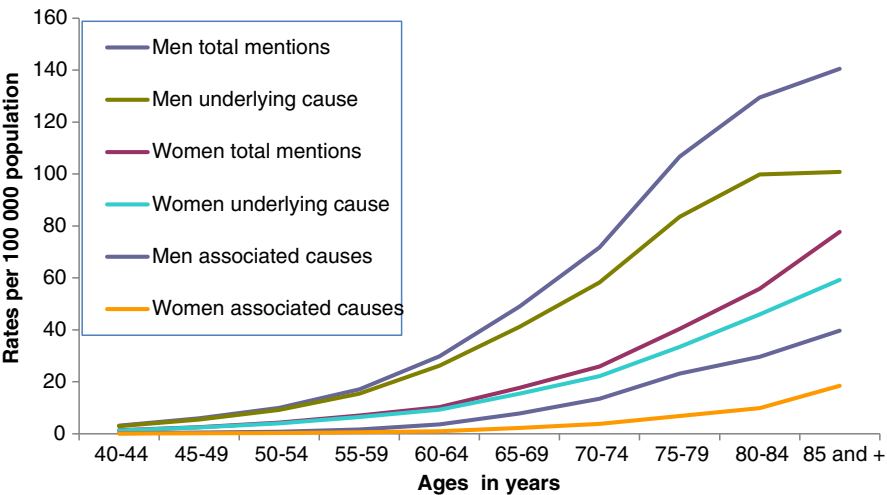

**B** - All mentions, 1985, 1990, 1995, 2000, 2005 and 2009

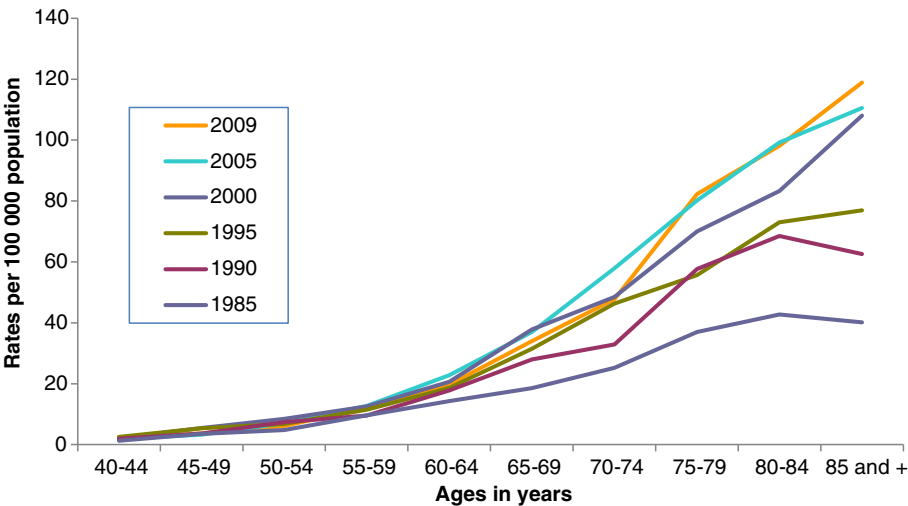

Supplement: MOESM4 [file 9493212]
